# Supplementary material for: Examination of distraction and discomfort caused by using glare monitors: a simultaneous electroencephalography and eye-tracking study
Source: PeerJ. 2023 Sep 15;11:e15992. doi: 10.7717/peerj.15992 (PMC10506577; doi:10.7717/peerj.15992)
Supplement: Supplemental Information 1 [file peerj-11-15992-s001.xlsx]

## Sheet: Illegibility rating
	glare	glare	glare	glare	glare	glare	non-glare	non-glare	non-glare	non-glare	non-glare	non-glare
ID	black_white	blue_white	yellow_white	white_black	blue_black	yellow_black	black_white	blue_white	yellow_white	white_black	blue_black	yellow_black
03	2	4	8	1	3	3	1	4	8	1	3	2
04	1	2	7	1	3	1	1	2	8	1	3	2
06	1	2	7	2	4	4	1	3	7	1	3	3
07	2	3	6	2	4	2	2	2	8	1	5	2
08	3	3	7	2	5	4	2	2	6	3	6	2
09	4	3	8	3	5	3	4	3	7	2	2	5
10	1	1	7	3	4	5	2	2	7	2	1	3
11	2	4	7	1	6	4	1	3	6	2	5	3
12	2	1	8	1	4	2	1	1	8	1	3	2
14	2	5	7	1	4	2	2	2	8	1	2	3
15	1	1	8	1	2	1	1	2	8	1	1	2
16	4	2	7	2	6	1	2	2	7	2	5	1
17	2	4	7	1	5	1	2	5	8	3	5	4
18	1	1	5	2	2	3	4	3	7	2	5	6
19	1	2	6	2	5	2	1	3	5	2	3	2
20	1	1	3	1	3	3	1	1	6	2	2	1
22	3	3	8	2	1	1	2	1	8	3	4	1
23	2	3	8	2	4	3	2	5	7	2	4	4

## Sheet: Reading time
	glare	glare	glare	glare	glare	glare	non-glare	non-glare	non-glare	non-glare	non-glare	non-glare
ID	black_white	blue_white	yellow_white	white_black	blue_black	yellow_black	black_white	blue_white	yellow_white	white_black	blue_black	yellow_black
03	2.31179	2.45512	2.43275	2.06941	2.12529	2.20747	2.09625	1.96968	2.17465	2.08686	2.07157	2.07298
04	3.29536	3.2446	3.16442	3.14083	3.5688	3.11785	2.78973	2.95681	2.9867	3.03587	2.88376	3.02419
06	2.09887	2.09937	1.8031	2.92503	2.05257	2.17936	2.03185	1.57389	1.50236	1.94044	1.58656	1.53428
08	3.41672	4.03279	4.24523	3.51918	3.43656	3.38819	4.00969	3.87917	3.68871	3.56832	3.92922	4.02494
09	3.58804	3.26733	3.57951	3.76029	3.79147	3.84948	2.72007	3.11457	3.43701	2.8932	3.00755	3.07025
10	3.50242	3.39143	3.4753	3.92806	3.92917	3.95291	4.17814	3.51362	3.89891	4.2349	4.25784	4.23922
11	3.42742	3.65094	3.65629	3.68884	3.79186	4.16212	2.80746	3.42263	3.62939	3.21063	3.50975	3.32973
12	2.36176	2.31031	3.342	2.3615	1.84418	1.83619	2.03257	2.19836	2.27501	2.15177	2.09723	1.89867
15	2.70916	2.91194	3.62296	2.94513	3.10614	2.8114	2.67362	2.98196	3.40902	2.63197	2.56008	2.80941
16	2.46531	3.27032	2.86285	2.6436	2.56276	3.08551	2.71373	3.2497	3.1492	2.94296	3.07916	3.26816
17	1.32866	1.24397	1.38181	1.21576	1.09595	1.16389	1.37469	1.29228	1.53972	1.38667	1.28142	1.36765
19	4.00847	3.94639	4.25853	3.95866	4.10604	4.06143	4.06914	4.07118	4.44612	4.01592	4.3057	4.27116
20	2.99407	2.64738	3.2102	2.86341	3.01964	2.72233	2.93681	3.10498	3.07674	3.33157	2.8608	2.89117
22	2.57567	3.40666	3.8418	3.45024	3.37108	3.43597	3.89548	3.67554	4.1202	3.61112	3.6126	3.85328
23	3.19795	2.52978	2.93331	3.04044	2.0925	2.67339	3.46706	3.04719	3.03153	3.01853	3.01132	2.73984

## Sheet: Fixation duration sentenceAOI
	glare	glare	glare	glare	glare	glare	non-glare	non-glare	non-glare	non-glare	non-glare	non-glare
ID	black_white	blue_white	yellow_white	white_black	blue_black	yellow_black	black_white	blue_white	yellow_white	white_black	blue_black	yellow_black
03	246.374	214.414	248.036	226.885	243.441	240.872	224.282	249.376	276.97	242.757	228.712	250.833
04	237.655	226.165	264.071	220.133	269.748	245.784	210	203.688	237.333	195.347	214.857	207.905
06	151.179	117.606	142.438	192.025	173.771	156.402	137.089	136.579	148.517	159.267	153.961	154.119
07	250.65	191.429	261.934	182.504	217.107	221.065	216.984	200.744	254.719	158.372	212.4	184.311
08	211.127	234.491	260.127	234.232	257.085	229.136	211.716	203.273	205.574	248.382	268.215	250.265
09	205.875	216.512	285.762	232.792	231.658	237.542	214.984	211.768	237.376	241.387	223.379	239.739
10	225.547	217.07	240.58	220.566	226.538	235.752	239.719	240.288	264.579	251.991	227.427	231.016
11	176.657	211.62	302.263	250.558	227.624	224.88	157.874	160.023	187.489	231.38	195.704	209.539
12	279.667	240.927	216.829	201.128	230.359	271.097	176.776	180.684	229.406	212.636	227.442	217.979
14	264.515	275.39	295.25	333.306	287.095	295.194	262.552	246.49	324.079	263.942	291.158	285.66
15	207.852	213.913	279.871	216.421	229.045	225.37	185.959	196.333	254.698	215.597	238.468	210.27
16	220.405	218.737	260.089	205.271	224.352	220.412	214.907	234.233	256.026	228.756	231.957	224.939
17	249.319	263.791	295.797	245.911	237.615	236.15	211.35	234.944	241.195	232.192	184.925	219.377
18	225.897	215.112	294.404	207.782	235.779	235.615	240.168	235.406	250.769	220.106	234.469	222.978
19	216.783	190.853	210.691	199.115	186.778	192.485	153.116	151.676	144.841	200.125	237.146	223.537
20	219.262	205.259	253.683	282.176	260.54	232.64	201.504	210.697	234.667	221.18	236.431	229.882
22	190.281	220.075	236.894	175.386	182.621	173.825	195.664	202.398	273.461	175.112	163.865	170.126
23	179.105	194.252	200.472	188.915	193.169	187.444	159.968	172.25	196.103	192.107	170.821	193.902

## Sheet: Fixation count sentenceAOI
	glare	glare	glare	glare	glare	glare	non-glare	non-glare	non-glare	non-glare	non-glare	non-glare
ID	black_white	blue_white	yellow_white	white_black	blue_black	yellow_black	black_white	blue_white	yellow_white	white_black	blue_black	yellow_black
03	7.66667	7.73333	7.33333	7.53333	7.86667	7.8	7.33333	6.73333	6.66667	6.86667	6.93333	6.8
04	7.53333	7.26667	6.53333	8	7.13333	6.8	6.6	8.33333	7	6.73333	6.53333	8.4
06	5.6	4.73333	5.33333	7.86667	7	8.13333	5.26667	3.8	3.86667	8	6.86667	7.26667
07	6.66667	8.86667	7.06667	8.2	6.86667	7.13333	8.2	7.8	6.4	8.06667	8	8.13333
08	7.33333	7.06667	6.8	6.6	7.06667	7.33333	7.73333	7.33333	7.66667	6.8	7.13333	7.8
09	9.06667	8.06667	6.73333	8	7.8	8	8.33333	9.2	7.8	7.93333	8.26667	7.66667
10	8.53333	8.6	7.93333	8.6	8.8	8.06667	8.53333	8.33333	7.13333	7.8	8.26667	8.46667
11	7.2	6.66667	6.33333	6.33333	6.73333	6.66667	6.33333	5.73333	6.26667	6.66667	7.66667	6.8
12	6.4	7.33333	7.4	7.26667	6.86667	6.86667	3.26667	2.53333	6.73333	7.33333	7.53333	6.33333
14	6.73333	7	6.4	5.66667	6.33333	6.2	7	6.93333	5.93333	6.93333	6.33333	6.66667
15	8.13333	8.4	6.73333	8.06667	7.4	7.93333	8.2	8.4	7.06667	7.93333	7.4	8.13333
16	8.4	7.6	7.46667	8.86667	8.13333	7.6	8.6	7.73333	7.73333	7.93333	7.73333	7.66667
17	6.26667	5.73333	4.93333	5.26667	6.06667	5.33333	5.33333	5.93333	5.8	6.6	5.33333	4.06667
18	7.73333	8.33333	6.26667	7.33333	6.93333	7.26667	6.73333	7.06667	7.2	6.93333	7.53333	5.93333
19	5.53333	7.73333	6.26667	6.93333	7.2	6.73333	7.46667	7.2	7.13333	6.4	5.93333	6.33333
20	8.13333	7.73333	6.93333	7.2	6.66667	7.6	8.2	8.13333	7.8	8.13333	7.26667	7.93333
22	8.53333	8	6.93333	8.46667	6.86667	7.6	7.33333	7.2	5.93333	7.73333	8.4	7.93333
23	9.53333	9	8.33333	9.46667	8.66667	9	8.33333	8.53333	8.4	8.06667	5.6	8.86667

## Sheet: Fixation count faceAOI
	glare	glare	non-glare	non-glare
ID	white	black	white	black
03	0	18	0	0
04	1	11	2	4
06	0	12	0	0
07	5	53	2	1
08	1	5	0	0
09	0	1	0	1
10	0	0	0	0
11	7	30	0	1
12	5	6	10	2
14	0	3	0	0
15	0	4	0	0
16	11	46	2	2
17	2	4	0	0
18	0	0	1	0
19	0	2	0	0
20	0	7	0	0
22	7	1	0	0
23	0	2	1	0

## Sheet: Fixation count upperAOI
	glare	glare	non-glare	non-glare
ID	white	black	white	black
03	0	0	0	0
04	0	1	0	0
06	1	2	0	0
07	0	1	0	0
08	0	22	0	0
09	0	0	0	0
10	0	1	0	0
11	0	2	3	0
12	2	1	2	0
14	0	0	0	0
15	0	0	1	0
16	0	0	0	0
17	3	26	0	1
18	1	0	2	0
19	0	1	1	0
20	0	0	0	0
22	0	0	0	0
23	0	0	2	1

## Sheet: theta
time range	0-400ms	0-400ms	0-400ms	0-400ms	0-400ms	0-400ms	0-400ms	0-400ms	0-400ms	0-400ms	0-400ms	0-400ms	0-400ms	0-400ms	0-400ms	0-400ms	400-1400ms	400-1400ms	400-1400ms	400-1400ms	400-1400ms	400-1400ms	400-1400ms	400-1400ms	400-1400ms	400-1400ms	400-1400ms	400-1400ms	400-1400ms	400-1400ms	400-1400ms	400-1400ms
regions	frontal	frontal	frontal	frontal	frontal	frontal	frontal	frontal	occipital	occipital	occipital	occipital	occipital	occipital	occipital	occipital	frontal	frontal	frontal	frontal	frontal	frontal	frontal	frontal	occipital	occipital	occipital	occipital	occipital	occipital	occipital	occipital
hemisphere	Left	Left	Left	Left	Right	Right	Right	Right	Left	Left	Left	Left	Right	Right	Right	Right	Left	Left	Left	Left	Right	Right	Right	Right	Left	Left	Left	Left	Right	Right	Right	Right
monitor	glare	glare	non-glare	non-glare	glare	glare	non-glare	non-glare	glare	glare	non-glare	non-glare	glare	glare	non-glare	non-glare	glare	glare	non-glare	non-glare	glare	glare	non-glare	non-glare	glare	glare	non-glare	non-glare	glare	glare	non-glare	non-glare
background	black	white	black	white	black	white	black	white	black	white	black	white	black	white	black	white	black	white	black	white	black	white	black	white	black	white	black	white	black	white	black	white
03	0.353239	0.984954	1.09682	1.19985	0.104668	0.764861	0.733359	0.81214	0.102468	1.01805	1.36482	1.54748	-0.129271	1.58264	1.07149	1.03708	0.135902	0.147779	0.225235	0.906798	-0.193687	0.353859	-0.0533227	1.1086	-0.246171	0.273379	0.332947	0.861591	-0.196287	0.662646	-0.0657515	0.877562
04	0.373046	-1.43146	0.481575	0.868645	-0.276985	-1.20219	0.591792	1.96321	0.164167	-0.309235	0.0367967	0.599425	-0.28135	-0.165004	0.456015	0.522393	0.407334	-1.71273	1.11442	1.88423	-0.548079	-2.43477	0.156202	1.80622	0.760426	-0.150441	0.376325	0.552888	0.0558038	-0.0685172	0.474421	0.268673
06	0.887396	-0.738228	0.315405	0.385549	0.88417	-0.768456	0.14576	0.126592	1.51533	1.08445	1.70225	0.353568	1.12607	-0.348689	0.223647	-0.0120186	0.661136	-0.904983	0.705525	-0.228902	0.449952	-0.978479	0.342259	-0.302004	1.32318	0.111918	1.25101	0.808638	0.270622	-0.862227	-0.157096	-0.107752
07	0.209591	0.830167	0.335819	1.4255	0.164046	0.81046	0.132711	1.4655	0.98798	0.919348	0.839765	0.909486	0.512982	1.12132	0.236109	0.871735	-0.770373	1.67623	0.0126787	1.12145	-0.858758	1.63154	-0.197579	1.12186	-0.758915	1.39714	-0.251902	0.73888	-1.10441	1.34392	-0.0294521	0.351323
08	0.501768	-0.673179	-0.0776589	0.844329	0.452053	-0.114316	-0.292097	0.440326	-0.140847	-0.554867	-0.955532	0.0621022	-0.159629	1.10678	-0.883608	1.22135	0.068711	-0.543073	1.32059	1.22686	0.113382	0.0254506	-0.290047	0.54583	-0.649412	-0.936063	-0.681378	0.19675	-0.173045	-0.191266	-0.817623	-0.009373
09	0.59584	0.174879	0.870353	0.89601	1.12776	-0.557697	0.681973	0.953845	1.77232	2.66195	1.73974	1.34621	2.10563	1.4112	1.04014	0.204418	1.16407	0.547827	-0.0582935	0.654554	1.36125	-0.445118	0.543941	0.585068	-0.0336772	1.43422	0.680205	1.24168	0.808232	-0.217678	0.616023	0.742005
10	-0.0665976	0.851315	0.213934	0.2694	-0.629087	0.379931	-0.0755989	0.237773	1.3146	0.363	0.568185	0.208718	0.466579	0.540979	0.124844	0.924105	0.120148	0.199852	0.182997	0.692373	-0.567535	0.0919263	-0.00158797	0.661794	-0.0154169	-0.204775	-0.191114	-0.433338	-0.333992	0.138267	-0.119422	-0.101691
11	1.23003	2.19667	0.797458	0.964806	0.755337	0.897175	0.635331	0.421933	0.694245	0.704152	-0.103393	1.14055	1.12464	1.31805	0.747799	1.08596	0.656915	1.16124	0.553201	1.09205	0.166782	0.761191	0.153349	0.79566	0.392792	0.524502	0.165543	1.31689	-0.155733	-0.81116	-0.53024	-0.0487174
12	-0.267617	0.304027	-0.755841	-0.332146	-0.404433	0.203655	-0.884083	-0.157051	0.233754	1.7671	1.11684	0.385117	-0.629948	0.293134	-1.29639	0.991601	0.470526	0.315204	-1.06736	-1.8455	0.364367	0.128161	-1.21375	-1.77062	0.636448	1.18831	0.487938	-1.40518	0.262051	-0.166703	-1.12369	-0.955054
14	0.277586	1.14035	-0.643372	1.48541	0.0952712	1.24461	0.03506	0.846261	1.41262	1.60885	1.76064	2.23358	1.92112	2.05236	3.07584	2.61508	-0.971405	0.136944	-0.886747	0.617224	-0.566731	0.381506	-0.330664	0.516785	0.42134	0.619371	0.53442	0.24101	1.1553	0.875182	1.59571	0.881656
15	0.483513	0.482579	0.136829	-0.0147752	0.552025	0.332118	-0.0739928	-0.1604	0.451119	0.64173	0.57004	0.972124	1.80653	0.502057	1.10542	0.0515602	-0.0397213	0.533431	-0.491637	1.17582	1.09948	1.15419	-0.78849	2.03428	0.559878	1.42499	0.0738415	2.88513	1.47459	1.34603	0.598126	2.56325
16	-0.117381	0.130136	0.537808	1.86385	-0.561867	0.151822	1.22535	0.962957	2.12627	2.18168	1.80917	1.76994	0.652859	-0.561116	0.062069	0.319421	-0.0827722	0.213922	0.530371	1.73049	-0.416241	0.293743	0.59269	0.80056	1.69342	1.84371	2.5265	2.25257	0.208286	-0.136814	-0.206478	0.706506
17	0.472112	0.628743	1.12133	-0.216878	-0.0586925	-0.145719	1.23659	0.72335	1.95716	1.89089	2.87687	2.05883	1.39826	1.3299	1.60103	1.45992	0.547063	1.03109	2.31025	0.727318	0.403163	0.06581	1.96465	1.00622	2.23	1.65341	3.78791	2.35782	1.81062	1.77846	2.83583	1.06828
18	1.65964	0.0153831	0.738616	-0.583481	1.15267	0.437747	1.0587	-0.470835	0.755827	0.47174	0.461424	0.627867	1.00307	0.72668	1.14668	0.178549	1.01008	-0.764647	-0.123109	0.0484424	0.632587	-0.251815	-0.204849	0.129366	0.608116	-0.353682	-0.000282669	0.235246	0.560629	-0.0548982	-0.232432	0.153876
19	0.414255	0.515835	-0.598542	-0.499051	0.510434	0.505537	-0.993082	-0.903515	-0.331557	0.990848	1.56119	0.474662	0.671338	1.12053	0.114985	0.812335	-0.203639	0.0155482	-0.689081	-0.261213	-0.285168	0.0892677	-0.25582	-0.895463	-0.534352	0.361413	0.141207	-0.180303	-0.196462	0.00197875	-0.284879	0.0348668
20	1.02448	0.182315	0.590311	0.80533	0.419398	-0.0735663	0.543049	0.25445	1.22716	0.628316	1.27392	1.42867	1.90322	1.77277	2.33006	2.31254	-0.0825414	0.225885	-0.168612	0.590476	-0.131167	0.0207877	0.268085	0.83428	0.605084	-0.0900437	0.823604	0.745305	1.53456	1.6566	1.28202	1.91297
22	0.690397	-0.0404788	0.415825	-0.0696613	0.0531225	-0.294976	-0.232784	0.169307	0.23319	-0.166052	0.178313	0.571522	0.918437	-0.263571	0.279751	0.627856	0.451222	0.531236	0.697668	0.611244	0.301725	-0.405718	0.227198	0.565674	0.858184	-0.132846	0.622699	0.104737	1.22219	-0.0390037	1.42308	0.916432
23	0.579283	0.842702	0.224335	1.35537	0.50482	0.731889	0.290779	1.40756	1.0463	1.96011	0.372561	0.724497	0.335614	1.17332	0.00794773	1.08292	0.751935	0.461036	0.58868	1.08248	0.471272	0.289691	0.653626	1.25682	1.55976	1.95589	1.08965	1.84414	0.672811	1.58849	0.744544	2.21524

## Sheet: alpha
time range	0-400ms	0-400ms	0-400ms	0-400ms	0-400ms	0-400ms	0-400ms	0-400ms	0-400ms	0-400ms	0-400ms	0-400ms	0-400ms	0-400ms	0-400ms	0-400ms	400-1400ms	400-1400ms	400-1400ms	400-1400ms	400-1400ms	400-1400ms	400-1400ms	400-1400ms	400-1400ms	400-1400ms	400-1400ms	400-1400ms	400-1400ms	400-1400ms	400-1400ms	400-1400ms
regions	frontal	frontal	frontal	frontal	frontal	frontal	frontal	frontal	occipital	occipital	occipital	occipital	occipital	occipital	occipital	occipital	frontal	frontal	frontal	frontal	frontal	frontal	frontal	frontal	occipital	occipital	occipital	occipital	occipital	occipital	occipital	occipital
hemisphere	Left	Left	Left	Left	Right	Right	Right	Right	Left	Left	Left	Left	Right	Right	Right	Right	Left	Left	Left	Left	Right	Right	Right	Right	Left	Left	Left	Left	Right	Right	Right	Right
monitor	glare	glare	non-glare	non-glare	glare	glare	non-glare	non-glare	glare	glare	non-glare	non-glare	glare	glare	non-glare	non-glare	glare	glare	non-glare	non-glare	glare	glare	non-glare	non-glare	glare	glare	non-glare	non-glare	glare	glare	non-glare	non-glare
background	black	white	black	white	black	white	black	white	black	white	black	white	black	white	black	white	black	white	black	white	black	white	black	white	black	white	black	white	black	white	black	white
03	0.141109	0.750978	0.967807	-0.475111	0.220611	0.754612	0.960446	-0.475082	0.0559213	1.58582	1.05255	0.93029	0.203073	1.11907	1.13147	0.20717	-1.53308	-1.71439	-2.33174	-3.3019	-1.68496	-1.70234	-2.22169	-3.27283	-0.460053	-1.07154	-1.73072	-1.38072	-0.441779	-1.15452	-1.58505	-2.59845
04	0.807714	-1.14487	1.47644	1.10357	0.182579	-0.316539	1.24376	1.23222	0.834655	-0.278323	1.74596	0.00384481	0.568828	-0.0468899	1.93418	0.354846	0.13009	-1.46731	0.126986	-0.0946451	-0.932378	-1.48183	-0.438199	-0.398101	0.102299	-0.538796	-0.311382	-0.831274	-0.372739	-0.220233	0.399171	-0.909545
06	0.120528	0.170142	0.196397	-0.511437	0.375685	0.228845	0.37047	-0.552889	0.120309	0.479521	1.41316	-0.237978	1.00782	0.404999	0.55078	-0.375014	0.135045	-0.663683	-0.702389	-0.980425	0.29221	-0.725635	-0.741621	-1.05442	0.977814	-0.362604	0.173254	-1.43006	0.515676	-0.972711	-0.774686	-1.26109
07	1.9243	-0.091626	-0.078405	-0.503687	1.6785	-0.0810742	-0.174826	0.0161802	0.831886	0.351246	0.000759101	-0.743756	0.663996	0.352073	-0.209877	1.01577	-2.27277	-1.75201	-0.953447	-0.899438	-1.82396	-1.37688	-0.933948	-0.516591	-1.3475	-0.756506	-1.20896	-1.57788	-1.55644	-0.994493	-1.35037	-0.275288
08	-0.303038	0.679887	0.650667	-0.422571	-0.396295	-0.0851179	1.3643	-0.553716	0.0390806	0.229748	-0.50583	-0.72825	0.546689	-0.212652	0.623251	-0.156238	-0.354665	0.246041	1.05898	0.139481	-0.310222	0.299417	0.264781	0.135512	-0.665946	0.548504	-0.338568	-0.883415	0.0408296	-0.358905	0.133665	-0.884474
09	0.42743	0.382931	1.64549	0.088331	0.937675	0.321804	0.261612	1.09959	0.511881	1.66565	2.92527	1.63864	-0.193612	-0.350161	0.637621	0.637033	-1.2077	-1.93278	0.675302	0.141559	-0.0283442	-1.50861	-0.307502	0.760797	-3.54408	-2.31148	-1.12186	-1.02579	-4.21889	-2.34958	-1.13677	-0.45687
10	0.587191	0.0780493	0.392453	0.0231033	0.123356	-0.679074	0.273654	0.20316	0.956395	-0.249825	-0.0721898	0.282653	0.75094	-0.880086	-1.14681	-0.268556	-0.779692	-1.22076	-1.06876	-0.799458	-0.846816	-1.33596	-0.922626	-0.961964	0.487536	-2.49345	-1.52592	-2.02259	0.0748553	-2.86442	-2.78038	-2.72554
11	-2.26385	-0.701493	-1.08962	0.931744	0.761044	0.251513	-0.434797	-0.129162	-1.2688	-0.200787	0.0162313	0.962818	-2.0344	-0.611679	-0.0246481	0.578914	-1.95595	-1.71959	-1.73375	0.375216	-0.570023	-0.069495	-0.559332	-0.43461	-1.35354	-1.80463	-1.40138	-0.1982	-1.39124	-1.84296	-0.0814308	0.374062
12	-1.03487	-1.27351	-0.385629	-0.63787	-1.10912	-1.27236	-0.406259	-0.231409	-0.727641	0.0909332	1.3632	0.165787	-1.18041	-0.660054	-0.793527	0.555511	-1.68445	-2.59312	-2.16971	-3.93743	-1.92421	-2.97179	-2.4935	-4.30399	-2.29288	-2.44136	-0.314303	-3.02486	-1.83594	-2.665	-3.27709	-4.18407
14	0.756522	-0.151899	-0.841131	0.115813	0.744571	-0.0725949	0.384995	0.101012	0.811359	0.117134	1.70409	0.111844	0.997356	0.497023	1.08408	1.53586	0.0720613	-0.405065	-0.458337	-0.181689	0.308566	-0.146357	0.350385	0.0911294	0.116562	0.0265709	0.0423264	-1.30318	0.765208	-0.689516	0.105796	-0.231712
15	0.5248	-0.0539056	0.113595	1.47413	0.791272	-0.279382	0.239283	1.38321	0.498583	-0.718737	0.443486	1.4164	0.927909	-0.475082	0.594609	1.45078	-0.0747728	0.214907	0.129065	1.1827	1.35013	0.669772	-0.313284	1.04647	0.163524	-0.860201	-0.0294371	1.36371	1.04746	0.150914	-0.407963	1.25612
16	0.0456358	-0.0762486	-0.124085	-0.256866	-0.386001	-0.564208	0.580273	-0.0618236	2.05813	1.6237	1.27986	1.14872	0.00875134	0.066435	-0.30195	0.987024	-0.729793	-0.264575	0.191063	-0.169538	-0.457753	-0.318421	0.429659	-0.776689	1.61003	-0.613805	1.41419	-0.411764	-0.838454	-0.784204	-0.638658	-1.39423
17	0.446292	-0.155695	-0.262124	0.695561	-0.239233	-0.972905	-0.747255	1.24926	0.120054	0.467624	-0.20696	1.62919	0.0695003	-0.0320994	-0.322236	0.540425	-0.325821	0.317432	0.563969	0.582337	-0.110704	-0.402947	0.399445	1.21885	-0.429321	-0.619839	-0.742868	-0.211881	-0.466401	-0.49778	-0.27855	-0.184059
18	0.970176	-0.909629	-0.507171	-0.26979	1.79664	-0.0385142	-0.068509	-0.0827421	0.900171	0.00489942	0.267941	0.170795	1.96816	0.509687	0.236953	0.288657	0.525067	-1.67867	-0.784856	-0.307474	0.928861	-0.99452	-0.715061	-0.682891	-0.0796129	-1.29693	-0.367122	-0.810998	0.569281	-1.059	-0.737958	-0.932293
19	0.277214	-0.455127	0.481232	0.447401	0.1592	-1.2172	0.0646988	0.344214	-0.0777183	0.226318	1.23823	-0.324328	0.276591	-0.651619	0.896771	0.0679248	-0.734847	-1.51622	1.13856	0.583221	-0.337955	-1.50491	1.36446	0.339047	-0.18007	-0.988068	0.783785	-0.659359	0.448054	-1.7957	1.19071	-0.0113486
20	-0.291343	-0.71494	0.570392	-0.0871267	-0.443201	-0.678248	0.473494	-0.171269	0.551914	1.05712	1.05604	1.1399	-0.132806	0.480492	0.750629	1.36729	-0.530117	-0.168933	0.439704	0.152766	-0.0968059	0.374163	0.708653	0.400703	-0.319311	-0.0549437	0.314911	-0.583166	0.186359	0.0860384	0.551481	0.263707
22	0.787081	0.455642	0.178451	0.575834	0.658104	0.228574	0.296546	-0.178521	1.00483	0.55014	-0.520494	0.19907	0.521349	0.275889	0.212208	-0.0683521	0.41311	-0.211724	1.28331	1.49533	1.12247	-0.123842	1.27629	0.850078	1.11388	-0.302754	0.784964	-0.0304971	0.965106	0.0248062	1.90541	0.551095
23	0.371798	0.715599	-0.37362	0.786664	0.0928771	0.645351	-0.267016	0.60685	0.784579	0.656617	-0.154197	0.105258	-0.152427	0.811987	-0.692714	0.150853	0.712994	0.805519	0.148151	0.820927	0.228416	0.592594	-0.169493	0.480623	-0.532433	-0.240174	-1.01203	-0.556647	-0.597796	0.320728	-0.914445	-0.335386

## Sheet: beta
time range	0-400ms	0-400ms	0-400ms	0-400ms	0-400ms	0-400ms	0-400ms	0-400ms	0-400ms	0-400ms	0-400ms	0-400ms	0-400ms	0-400ms	0-400ms	0-400ms	400-1400ms	400-1400ms	400-1400ms	400-1400ms	400-1400ms	400-1400ms	400-1400ms	400-1400ms	400-1400ms	400-1400ms	400-1400ms	400-1400ms	400-1400ms	400-1400ms	400-1400ms	400-1400ms
regions	frontal	frontal	frontal	frontal	frontal	frontal	frontal	frontal	occipital	occipital	occipital	occipital	occipital	occipital	occipital	occipital	frontal	frontal	frontal	frontal	frontal	frontal	frontal	frontal	occipital	occipital	occipital	occipital	occipital	occipital	occipital	occipital
hemisphere	Left	Left	Left	Left	Right	Right	Right	Right	Left	Left	Left	Left	Right	Right	Right	Right	Left	Left	Left	Left	Right	Right	Right	Right	Left	Left	Left	Left	Right	Right	Right	Right
monitor	glare	glare	non-glare	non-glare	glare	glare	non-glare	non-glare	glare	glare	non-glare	non-glare	glare	glare	non-glare	non-glare	glare	glare	non-glare	non-glare	glare	glare	non-glare	non-glare	glare	glare	non-glare	non-glare	glare	glare	non-glare	non-glare
background	black	white	black	white	black	white	black	white	black	white	black	white	black	white	black	white	black	white	black	white	black	white	black	white	black	white	black	white	black	white	black	white
03	0.0866224	0.0525524	0.0790586	-0.114316	0.202098	0.0188538	0.200268	-0.22956	-0.176725	0.444432	0.40686	0.145275	-0.248402	0.208888	-0.1134	-0.516863	-0.464373	-1.24538	-0.771468	-1.03107	-0.3693	-0.809483	-0.263831	-0.91283	0.0359545	-0.169046	-0.697676	-0.574051	-0.387735	0.0389255	-0.557176	-0.786203
04	0.726222	-1.65181	-2.00943	0.850404	0.45025	0.20907	-0.747945	0.420852	0.624155	0.28019	0.935823	0.445052	-0.0456796	-0.00948069	0.251544	0.424293	0.273369	-1.05474	-2.54941	1.11389	-0.457248	-0.810452	-0.321762	0.222263	-0.0173968	-0.310476	0.408194	-0.193671	-0.127191	-0.346792	0.188578	-0.109655
06	0.509073	0.693178	0.633751	0.174944	0.501506	0.942922	0.552962	0.0626961	-0.205657	-0.12988	1.08389	0.262254	0.46562	1.09435	0.200569	-0.132557	-0.157752	-0.271875	-0.18575	-0.464464	-0.232233	-0.174711	-0.281029	-0.571076	-0.349432	-1.70921	-0.727032	-1.70771	-0.318558	-0.508893	-0.582624	-0.964338
07	0.569303	-0.201152	-1.10811	-1.2583	0.492612	-0.274447	-1.09535	-1.09086	0.684735	0.59922	-0.659061	-0.20428	0.328057	-0.286978	-0.875425	0.0968454	-0.848111	-1.52088	-1.34413	-1.70912	-0.622222	-1.35679	-1.35296	-1.5007	-0.257822	-0.631063	-1.57683	-0.869322	-0.69917	-1.27571	-1.55018	-0.78107
08	0.511524	-0.374161	-0.165342	0.391135	0.556178	-0.185762	-0.193732	0.434264	0.428714	-0.13336	-0.931232	-0.024248	1.10051	0.128031	-0.0389997	-0.0470755	0.396428	-0.802691	-0.0059218	0.543778	0.698063	-0.522239	0.0957367	0.733424	0.0472706	-0.10915	-0.63364	0.584613	0.681728	0.060568	-0.73236	-0.180017
09	-0.401811	-1.11682	0.0696158	0.572947	-0.115146	-0.892878	0.207939	0.545825	0.29766	0.215393	0.579875	0.373252	-0.711458	-0.829963	0.108953	0.332458	-0.513123	-1.33599	-0.411792	-0.0683021	0.0281099	-1.20122	0.208346	0.0598746	-2.0441	-1.70913	-1.55768	-0.714812	-2.98706	-1.89808	-1.04403	-0.894695
10	-0.0518514	0.0328393	-0.22882	-0.575564	-0.174375	0.113302	-1.70703	-0.796655	0.0135993	-0.955783	-1.13028	-0.304528	0.508301	-0.401714	-1.89198	-0.88192	-0.657769	-0.523457	-1.20057	-0.52281	-0.420028	-0.431775	-1.51456	-0.870384	-0.237723	-2.02115	-2.14287	-1.18328	-0.0151717	-1.8738	-2.74794	-2.63542
11	-1.50873	-0.396148	-1.05872	0.634476	0.0277063	-0.0518856	-0.0929867	0.121971	-1.82268	-0.536315	-0.170123	0.819584	-2.22089	-1.40298	-0.277571	0.00719645	-1.21956	-1.86861	-1.41137	-0.44432	-0.733789	-0.262357	-0.825224	-0.293163	-1.99146	-2.13589	-1.35483	-0.877417	-1.32198	-1.83341	0.219012	0.193636
12	-0.0379903	-0.762271	0.650492	-0.365724	-0.132229	-0.838963	0.424066	-0.267343	-0.609153	-1.19342	0.322535	-0.819758	-0.335734	-0.796685	-0.380481	-0.260434	-0.775193	-1.17483	-1.09022	-1.84312	-1.04102	-1.52667	-1.43169	-2.148	-1.01728	-1.46446	-0.854843	-1.86098	-1.46244	-1.74158	-2.04041	-2.2114
14	0.72975	-0.199027	-1.67577	-0.530278	0.640266	0.135569	-0.87143	0.295687	-0.0547911	-0.261831	0.615821	0.330254	0.109042	-0.030557	-0.511199	-0.586991	0.81538	-0.818617	-0.220278	-0.382363	0.789299	-0.210907	-0.668085	0.404855	-0.590535	-1.07958	-0.766544	-0.984396	0.945286	-0.159408	-0.660386	-0.98738
15	-0.084477	-1.32985	-1.09859	-0.857915	-0.08046	-1.58915	-1.27686	-0.236432	0.0167286	-0.958852	-0.256542	0.0502934	0.0122321	-1.3226	-1.22597	-0.202717	-0.424569	-1.8628	-0.801782	-0.675459	-0.336138	-1.71148	-1.25258	-0.730611	-0.278488	-1.68104	-0.85066	-0.172402	0.118016	-1.10053	-1.58585	-0.823161
16	0.304214	0.314682	0.169397	-0.45696	0.0594402	0.264955	0.276059	-0.643197	0.3239	0.974455	-0.437163	-0.151659	-0.13422	0.00252527	-0.462699	-0.62483	0.181755	-0.0721352	-0.731822	-1.09488	0.0217711	-0.0679162	-0.3826	-1.2998	0.36511	-0.706871	-1.29086	-2.0107	-0.691828	-0.45352	-1.12649	-1.75988
17	-0.266322	0.608535	-1.28864	-0.0415216	-0.535897	-0.669851	-0.878286	0.156227	-0.358733	-0.1524	-0.102891	0.125314	-0.130781	-0.277205	-0.938923	-1.08523	-0.577165	0.0866715	-0.266644	-0.200432	-0.461472	0.0995887	-0.119259	0.945039	-0.931637	-1.13155	-0.994316	-1.57202	-0.39569	-0.211609	-0.845097	-1.28972
18	0.245887	-0.0859898	-0.685818	0.084324	0.393245	-0.0575845	-0.449357	-0.273695	0.00646768	-0.300957	-0.7808	0.00735079	0.70322	-0.0188832	-0.711873	-0.294765	-0.206127	-0.550282	-0.592332	0.256049	0.402364	-0.372654	-0.345104	-0.38269	-0.112679	-0.955901	-0.897552	-0.148717	0.358619	-0.621054	-0.697399	-0.7902
19	-0.143961	-0.661672	0.461048	-0.647264	-0.39255	-0.968202	1.00144	-0.36486	-0.343533	-0.452379	-0.225082	-0.550127	-0.388001	-0.811464	1.44489	-0.733379	-0.382811	-1.23732	0.239585	-0.583588	-0.168411	-0.913831	0.725022	-0.443097	-0.186197	-0.474286	-0.588519	-0.640613	-0.445488	-0.85123	0.338015	-0.715385
20	-0.356886	0.29268	0.429389	-0.541819	-0.0708909	0.289287	0.167491	-0.318692	0.689138	0.211961	0.836324	0.58906	-0.133245	0.0413297	0.412111	0.753707	0.315729	0.469038	-0.213952	-0.390475	0.668721	0.592611	-0.366657	-0.11772	0.363239	-0.116172	0.113889	-0.468302	0.45247	0.0486394	-0.431346	0.313054
22	0.23264	1.16242	-0.126477	1.36718	0.739258	0.6362	-0.175913	1.4313	0.374609	0.94383	-0.0244805	0.724614	0.692033	0.622171	0.20458	0.905049	-0.0948322	0.341307	0.129238	1.14325	0.317082	-0.0539647	-0.0172182	1.06003	0.341161	0.25785	-0.0539484	0.697929	0.327328	0.0314487	0.203796	0.764814
23	0.275839	0.389296	0.0465089	0.00311494	0.0790005	0.201614	0.121955	-0.175657	-0.0164448	0.0372079	-0.775226	0.486597	-0.625741	-0.190998	-0.0427172	-0.182311	0.54231	0.63084	-0.301572	-0.119009	0.312364	0.489733	-0.4558	-0.380244	-0.598954	-0.37904	-0.425661	-0.601954	-0.400685	-0.0575419	-0.343616	-0.56653
